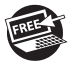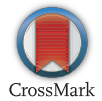

COMMENT ON SHAH ET AL.

## Cardiovascular Complications and Mortality After Diabetes Diagnosis for South Asian and Chinese Patients: A Population-Based Cohort Study. *Diabetes Care* 2013;36:2670–2676

*Diabetes Care* 2014;37:e78–e79 | DOI: 10.2337/dc13-2490

Shah et al. (1) suggest that the consequences of new-onset diabetes may be less severe in South Asian and Chinese patients and accounts for equivalent (South Asians) or lower (Chinese) risks of cardiovascular disease compared with Europeans with diabetes. They claim that missing data on key cardiovascular disease risk factors, in particular smoking, could not account for such ethnic differences. These assertions may be overstated.

In the British Southall And Brent REvisited (SABRE) population-based cohort, with detailed risk factor assessment, diabetes, whether newly diagnosed or established, was associated with a greater risk of both coronary heart disease and stroke mortality in migrant British South Asians than in comparable Europeans (2). Age- and sex-adjusted hazard ratios (HRs) for coronary heart disease mortality over 19 years of follow-up in people with diabetes newly diagnosed at the time of baseline studies (1988–1991, Europeans:  $n = 76$ , South Asians:  $n = 138$ ) were: Europeans, 0.5 (95% CI 0.1–1.9); South Asians, 2.7 (1.6–4.5); ethnicity  $\times$  new diabetes interaction,  $P = 0.02$ . Deaths due to stroke were few in this group, nevertheless a similar picture was observed (age- and sex-adjusted HRs: Europeans, 0.8 [0.1–6.2]; South Asians, 2.8 [1.6–5.1];  $P$  for

interaction = 0.27) (2). More recently in the entire SABRE cohort, we reported double the risk of fatal and nonfatal stroke in South Asians with baseline diabetes compared with Europeans (after multivariable adjustment for known risk factors including smoking, ethnicity  $\times$  diabetes interaction:  $P = 0.038$ ) (3).

Shah et al. (1) were unable to adjust their analyses for smoking status. However, smoking prevalence in Canada differs markedly by ethnicity: South Asians, 10%; Chinese, 13%; whites, 25% (in Ontario) (4). In the SABRE cohort, the ethnic differential in all-cause mortality is nonexistent in those with newly diagnosed diabetes at baseline if adjusted for age and sex only (South Asians vs. Europeans: HR 1.00 [0.66–1.51]); however, further adjustment for baseline smoking, which was significantly more frequent in the Europeans (32% vs. 16%) increases the ethnic differential to 1.32 (0.83–2.10) (unpublished data). Although numbers of participants with newly diagnosed diabetes in our cohort were small, the increase in point estimate suggests that were it possible to adjust for smoking in the very large Ontario data set (1) an excess of cardiovascular complications and all-cause mortality could be revealed in the South Asians and that the protection apparently enjoyed by

Therese Tillin,<sup>1</sup> Naveed Sattar,<sup>2</sup> Nita Forouhi,<sup>3</sup> Alun D. Hughes,<sup>1</sup> and Nish Chaturvedi<sup>1</sup>

the Chinese group could be diminished. We have also shown that low smoking rates in South Asians may largely account for their low risks of peripheral vascular disease and amputation (5).

Thus, there is a real potential for the risk of cardiovascular and other complications to be downplayed in South Asians with diabetes on the basis of this study, which was conducted in a relatively young population using indirectly collected data, with limited duration of follow-up (median 4.7 years) and without accounting for key confounders, in particular smoking.

**Funding.** The SABRE study was funded by the Wellcome Trust and British Heart Foundation.

**Duality of Interest.** No potential conflicts of interest relevant to this article were reported.

### References

- Shah BR, Victor JC, Chiu M, et al. Cardiovascular complications and mortality after diabetes diagnosis for South Asian and Chinese patients: a population-based cohort study. *Diabetes Care* 2013;36:2670–2676
- Tillin T, Forouhi NG, McKeigue PM, Chaturvedi N; SABRE Study Group. Southall And Brent REvisited: cohort profile of SABRE, a UK population-based comparison of cardiovascular disease and diabetes in people of European, Indian Asian and African Caribbean origins. *Int J Epidemiol* 2012;41:33–42
- Tillin T, Hughes AD, Mayet J, et al. The relationship between metabolic risk factors

<sup>1</sup>Institute of Cardiovascular Sciences, University College London, London, U.K.

<sup>2</sup>Institute of Cardiovascular and Medical Sciences, University of Glasgow, Glasgow, U.K.

<sup>3</sup>MRC Epidemiology Unit, University of Cambridge School of Clinical Medicine, Cambridge, U.K.

Corresponding author: Therese Tillin, t.tillin@imperial.ac.uk.

© 2014 by the American Diabetes Association. See <http://creativecommons.org/licenses/by-nc-nd/3.0/> for details.

and incident cardiovascular disease in Europeans, South Asians, and African Caribbeans: SABRE (Southall and Brent Revisited) — a prospective population-based study. *J Am Coll Cardiol* 2013;61:1777–1786

4. Chiu M, Austin PC, Manuel DG, Tu JV. Cardiovascular risk factor profiles of recent immigrants vs long-term residents of Ontario: a multi-ethnic study. *Can J Cardiol* 2012;28:20–26

5. Chaturvedi N, Abbott CA, Whalley A, Widdows P, Leggetter SY, Boulton AJ. Risk of diabetes-related amputation in South Asians vs. Europeans in the UK. *Diabet Med* 2002;19:99–104
